# Supplementary material for: Virus Genotype-Dependent Transcriptional Alterations in Lipid Metabolism and Inflammation Pathways in the Hepatitis C Virus-infected Liver
Source: PubMed Central journal article supplement (PMC6646375; doi:10.1038/s41598-019-46664-0), 2019-07-22
Supplement: 41598_2019_46664_MOESM1_ESM.pdf [file 41598_2019_46664_MOESM1_ESM.pdf]

# ***Supplemental data for “Virus Genotype-Dependent Transcriptional Alterations in Lipid Metabolism and Inflammation Pathways in the Hepatitis C Virus-infected Liver”***

d’Avigdor W.M.H.<sup>\*1,2</sup>, Budzinska M.A.<sup>\*1,2,3</sup>, Lee M.<sup>1</sup>, Lam R.<sup>1</sup>, Kench J.<sup>2</sup>, Stapelberg M.<sup>1,2</sup>, McLennan S.V.<sup>2</sup>, Farrell G.<sup>4</sup>, George J.<sup>5</sup>, McCaughan G.W.<sup>1,2,6</sup>, Tu T.<sup>#1,7,8,10</sup>, and Shackel N.A.<sup>#1,2,8,9</sup>

\* Authors contributed equally to this study; # Authors contributed equally to this study

<sup>1</sup> Liver Injury and Cancer Laboratory, Centenary Institute of Cancer Medicine and Cell Biology, Sydney, NSW, Australia

<sup>2</sup> Sydney Medical School, University of Sydney, Sydney, NSW, Australia

<sup>3</sup> Gastroenterology and Liver Research Laboratory, Ingham Institute, Liverpool, NSW, Australia

<sup>4</sup> Australian National University, Canberra, ACT, Australia

<sup>5</sup> Storr Liver Centre, Westmead Institute for Medical Research, University of Sydney and Westmead Hospital, Westmead, NSW 2145, Australia

<sup>6</sup> A.W. Morrow Gastroenterology and Liver Centre, Royal Prince Alfred Hospital, Sydney, NSW, Australia

<sup>7</sup> Department of Infectious Diseases, Molecular Virology, Heidelberg University Hospital, Heidelberg, Germany

<sup>8</sup> South-Western Sydney Clinical School, University of New South Wales, Liverpool, NSW, Australia

<sup>9</sup> Department of Gastroenterology and Hepatology, Liverpool Hospital, Liverpool, NSW, Australia

<sup>10</sup> German Center for Infection Research (DZIF), Heidelberg Partner Site, Heidelberg, Germany

## **Correspondence**

Nicholas Shackel, Gastroenterology and Liver Research Group, Ingham Institute, University of New South Wales, via PO Box 3151 (Westfields Liverpool), Liverpool NSW 2170, Australia; Email: n.shackel@unsw.edu.au

# Supplementary Figure 1

## A Non-negative matrix factorisation

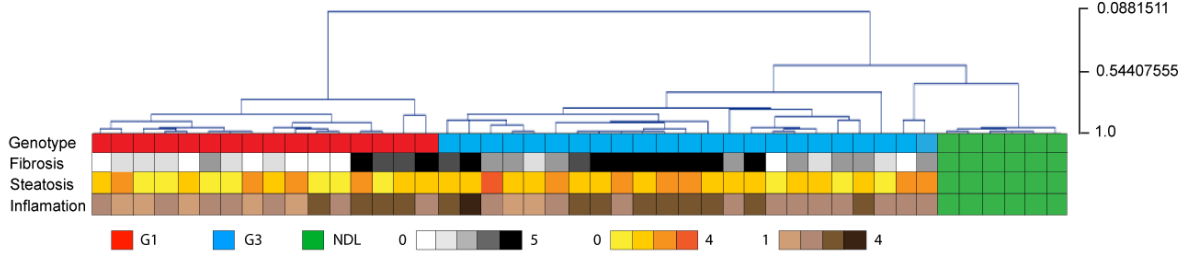

## B

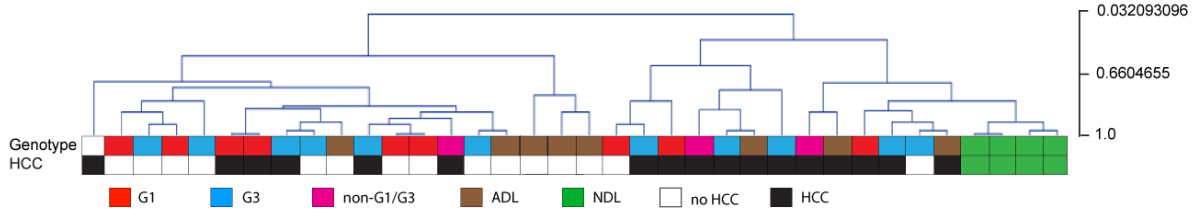

## C Hierarchical Clustering

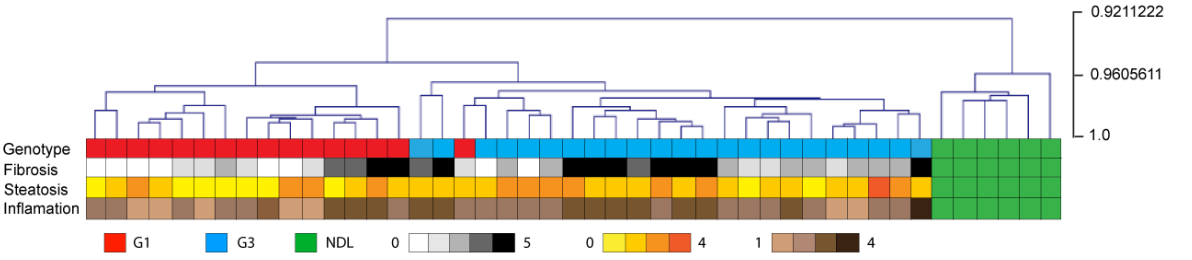

## D

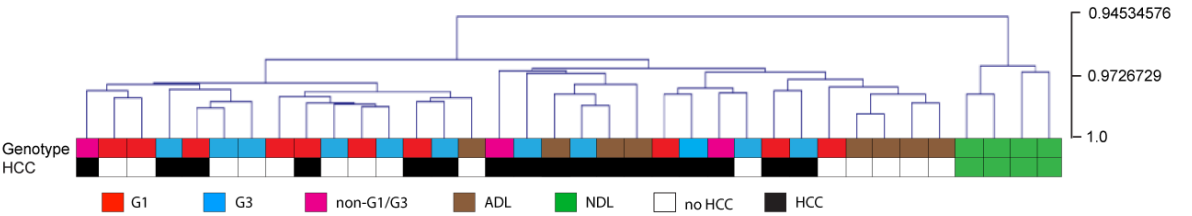

Supplementary Figure 2

A

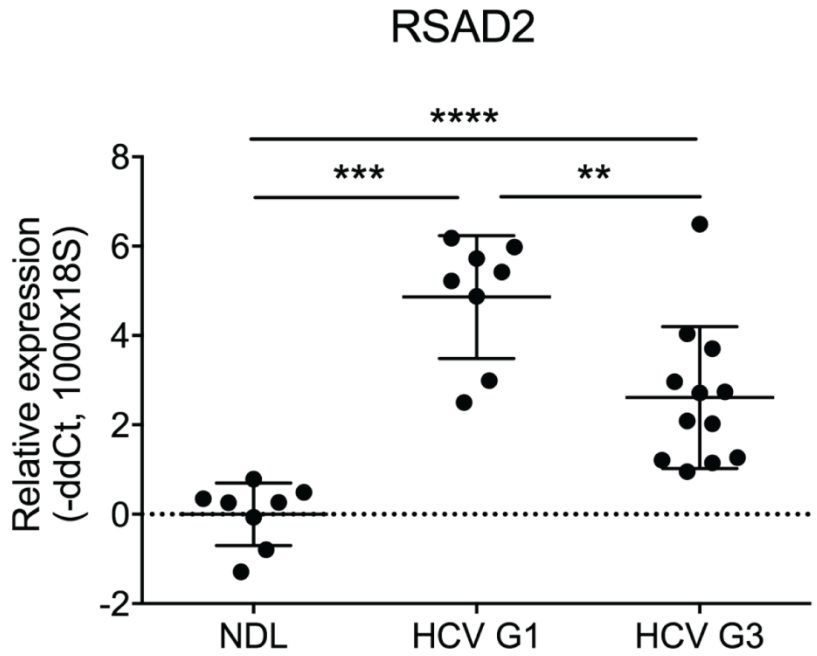

B

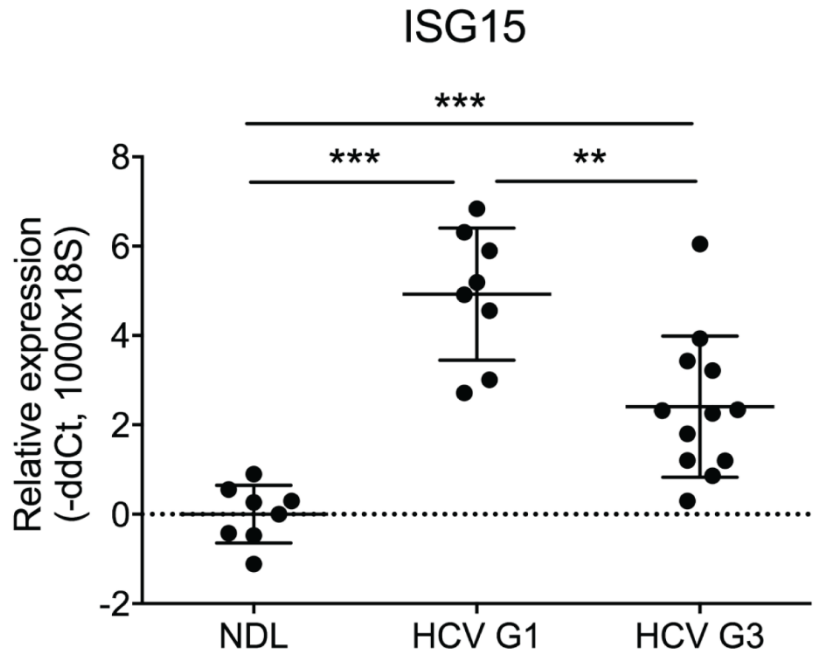

**A** Progressive Liver Injury

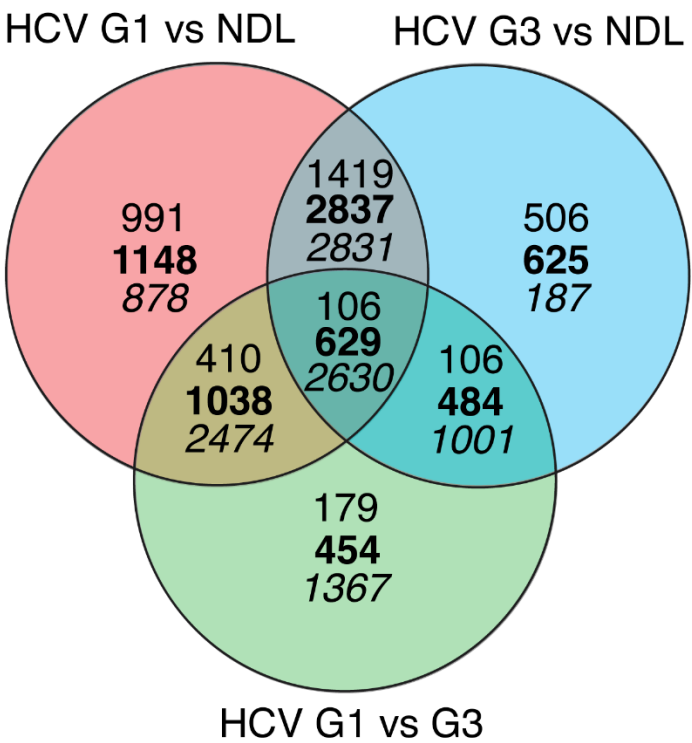

**B** Advanced Liver Injury

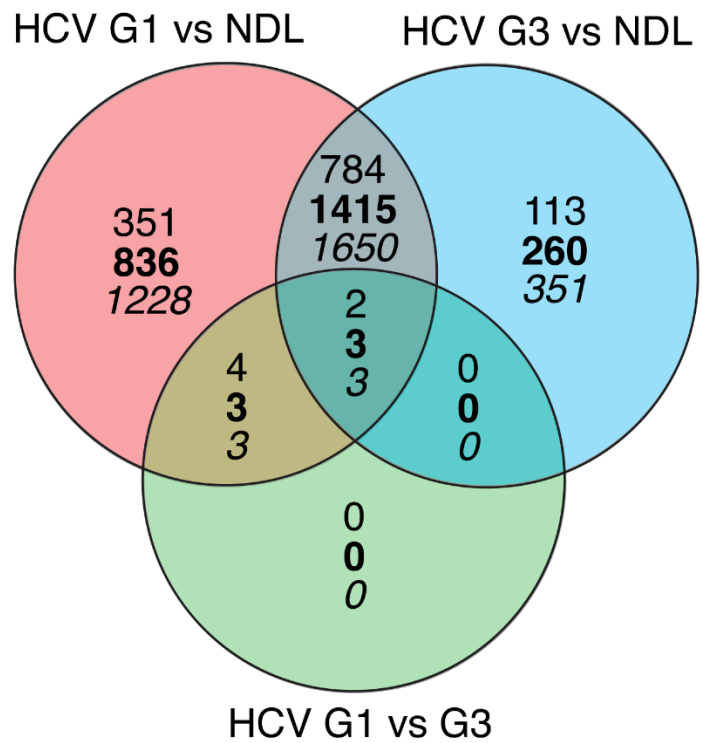

Normal      > 2-fold  
**Bold**      > 1.5-fold  
*Italics*      No cut-off

## Supplementary Figure legends

### Supplementary Figure 1 – Unsupervised analysis of liver genes expression in HCV liver injury

Non-negative matrix factorisation (A-B) and hierarchical clustering (C-D) of the whole liver gene expression profiles of HCV-induced progressive liver injury (A, C) and advanced liver injury (B, D). In progressive liver injury (A, C) 3 groups shows distinct separation: patients infected with HCV Genotype 1 (red); genotype 3 (blue) and non-diseased liver (green). This separation is not observed in advanced liver injury (B, D).

### Supplementary Figure 2 – ISGs are upregulated in HCV-infected tissues

Taqman qRT-PCR validation of interferon stimulated genes RSAD2 and ISG15 in progressive HCV-induced liver disease comparing genotype 1 (HCV G1, n=8), genotype 3 (HCV G3, n=12), and non-diseased liver (NDL, n=8); Mann-Whitney *U*-test; \*\* $p < 0.01$ , \*\*\* $p < 0.001$ , \*\*\*\* $p < 0.0001$ .

### Supplementary Figure 3 - Overlap of differentially expressed genes between non-diseased livers (NDL) and livers from patients infected with HCV genotype 1 (HCV G1) or genotype 3 (HCV G3)

Venn diagrams show the overlap of differentially expressed liver genes in HCV-induced progressive (A) and advanced (B) liver injury. Numbers refer to genes thresholded with a fold change of >2 (normal font), of >1.5 (bold), and with no threshold (italics).

## Supplementary Tables

**Supplementary Table 1 – Top 100 up- and down-regulated genes in progressive HCV liver injury (HCV genotype 3 vs genotype 1).**

| Increased expression in HCV genotype 3 |             |             |          | Decreased expression in HCV genotype 3 |             |          |
|----------------------------------------|-------------|-------------|----------|----------------------------------------|-------------|----------|
| Rank                                   | Gene symbol | Fold Change | p-value* | Gene symbol                            | Fold Change | p-value* |
| 1                                      | STMN2       | 4.61        | 0.031    | CROP                                   | -14.68      | <0.001   |
| 2                                      | MMP7        | 4.22        | <0.001   | ASCL1                                  | -14.36      | 0.042    |
| 3                                      | ACTG2       | 4.01        | 0.478    | C1orf63                                | -14.08      | <0.001   |
| 4                                      | AKR1B10     | 3.95        | 0.379    | PILRB                                  | -13.75      | <0.001   |
| 5                                      | CLOCK       | 3.85        | <0.001   | AFAR3                                  | -13.40      | <0.001   |
| 6                                      | SPINK1      | 3.68        | 0.164    | AHSA2                                  | -11.36      | <0.001   |
| 7                                      | HLA-DQB2    | 3.67        | 0.017    | RAPH1                                  | -11.31      | <0.001   |
| 8                                      | IGJ         | 3.53        | <0.001   | CDK5RAP3                               | -10.32      | <0.001   |
| 9                                      | SAA2        | 3.45        | 0.053    | DNAH1                                  | -10.25      | <0.001   |
| 10                                     | C15orf48    | 3.42        | <0.001   | GSDML                                  | -9.23       | <0.001   |
| 11                                     | RBM43       | 3.37        | <0.001   | FAM99A                                 | -9.00       | <0.001   |
| 12                                     | CLDN11      | 3.30        | <0.001   | NKTR                                   | -8.59       | <0.001   |
| 13                                     | SCGB3A1     | 3.24        | 0.006    | CAPN12                                 | -8.13       | <0.001   |
| 14                                     | SAA1        | 3.20        | 0.070    | LOC440354                              | -8.11       | <0.001   |
| 15                                     | CTSG        | 3.20        | <0.001   | WDR33                                  | -8.07       | <0.001   |
| 16                                     | COL1A1      | 3.12        | <0.001   | HAPLN4                                 | -7.87       | <0.001   |
| 17                                     | SPP1        | 3.11        | 0.012    | RBM33                                  | -7.76       | <0.001   |
| 18                                     | ITM2A       | 3.05        | <0.001   | LOC440993                              | -7.68       | <0.001   |
| 19                                     | MYH11       | 3.05        | 0.026    | PLA2G4B                                | -7.36       | <0.001   |
| 20                                     | THY1        | 2.97        | <0.001   | ATHL1                                  | -7.28       | <0.001   |
| 21                                     | TMEM119     | 2.93        | <0.001   | PRPF4B                                 | -7.25       | <0.001   |
| 22                                     | CD24        | 2.91        | 0.012    | LOC285908                              | -6.85       | <0.001   |
| 23                                     | CLDN10      | 2.87        | <0.001   | PNN                                    | -6.82       | <0.001   |
| 24                                     | FCER1A      | 2.86        | <0.001   | LOC387601                              | -6.74       | <0.001   |
| 25                                     | MOXD1       | 2.82        | 0.012    | NSUN5C                                 | -6.71       | <0.001   |
| 26                                     | LYZ         | 2.81        | 0.007    | CHRD                                   | -6.54       | <0.001   |
| 27                                     | CTSC        | 2.81        | <0.001   | C6orf111                               | -6.39       | <0.001   |
| 28                                     | FABP4       | 2.80        | <0.001   | LOC149134                              | -6.37       | <0.001   |
| 29                                     | ENTPD1      | 2.80        | <0.001   | LRCH4                                  | -6.33       | <0.001   |
| 30                                     | S100A11     | 2.76        | <0.001   | LRP5L                                  | -6.31       | <0.001   |
| 31                                     | HLA-DPB1    | 2.73        | <0.001   | SCNN1D                                 | -6.21       | <0.001   |
| 32                                     | NTS         | 2.73        | <0.001   | SMG1                                   | -6.18       | <0.001   |
| 33                                     | CTHRC1      | 2.73        | <0.001   | C20orf59                               | -6.16       | <0.001   |
| 34                                     | TIMD4       | 2.71        | <0.001   | AFG3L1                                 | -6.16       | <0.001   |
| 35                                     | LCN2        | 2.69        | <0.001   | HEMK1                                  | -6.01       | <0.001   |
| 36                                     | CXCR3       | 2.68        | <0.001   | NPHP3                                  | -5.87       | <0.001   |
| 37                                     | SPON1       | 2.68        | 0.012    | MAPK8IP3                               | -5.67       | <0.001   |
| 38                                     | CD248       | 2.66        | <0.001   | LOC440503                              | -5.60       | <0.001   |
| 39                                     | GPC4        | 2.64        | <0.001   | WBSCR14                                | -5.54       | <0.001   |

|    |         |      |        |           |       |        |
|----|---------|------|--------|-----------|-------|--------|
| 40 | QPCT    | 2.62 | <0.001 | CRYGS     | -5.48 | <0.001 |
| 41 | RGS10   | 2.62 | <0.001 | KIAA1875  | -5.42 | <0.001 |
| 42 | SAA1    | 2.62 | 0.042  | ONECUT1   | -5.30 | <0.001 |
| 43 | TIMP2   | 2.61 | <0.001 | ZDHC11    | -5.25 | <0.001 |
| 44 | SLAMF8  | 2.61 | <0.001 | C1orf188  | -5.24 | <0.001 |
| 45 | KLRB1   | 2.61 | <0.001 | HNRPD     | -5.23 | <0.001 |
| 46 | KRT19   | 2.59 | <0.001 | NPIP      | -5.07 | <0.001 |
| 47 | GLIPR1  | 2.58 | <0.001 | LOC440348 | -5.02 | <0.001 |
| 48 | FHL2    | 2.57 | <0.001 | CAPN3     | -4.86 | <0.001 |
| 49 | FBLN1   | 2.57 | <0.001 | IFRD1     | -4.86 | <0.001 |
| 50 | VPS24   | 2.56 | <0.001 | GABBR1    | -4.85 | <0.001 |
| 51 | FPR1    | 2.56 | <0.001 | MRPS25    | -4.82 | <0.001 |
| 52 | GAS1    | 2.54 | <0.001 | CCDC14    | -4.81 | <0.001 |
| 53 | JAM2    | 2.53 | <0.001 | EPB41L5   | -4.74 | <0.001 |
| 54 | DKK3    | 2.53 | <0.001 | XIST      | -4.71 | 0.017  |
| 55 | APOD    | 2.52 | 0.143  | C9orf45   | -4.70 | <0.001 |
| 56 | SMOC2   | 2.52 | 0.012  | TRPV1     | -4.70 | <0.001 |
| 57 | FXD2    | 2.52 | <0.001 | HSD17B3   | -4.67 | <0.001 |
| 58 | ANXA2   | 2.51 | <0.001 | WSB1      | -4.60 | <0.001 |
| 59 | COG5    | 2.50 | <0.001 | VAMP1     | -4.59 | <0.001 |
| 60 | EMP1    | 2.50 | 0.007  | CYP3A43   | -4.58 | <0.001 |
| 61 | FAM26F  | 2.50 | 0.026  | COL27A1   | -4.56 | <0.001 |
| 62 | CD48    | 2.49 | <0.001 | C8orf46   | -4.56 | <0.001 |
| 63 | RPS4Y1  | 2.49 | <0.001 | ATG16L2   | -4.53 | <0.001 |
| 64 | IL8     | 2.48 | 0.266  | DIDO1     | -4.49 | <0.001 |
| 65 | RNASE6  | 2.48 | <0.001 | LOC88523  | -4.49 | <0.001 |
| 66 | PRKCDP  | 2.48 | <0.001 | GCN5L2    | -4.46 | <0.001 |
| 67 | DCN     | 2.48 | <0.001 | C1orf168  | -4.45 | <0.001 |
| 68 | PLAC9   | 2.48 | <0.001 | FNBP4     | -4.45 | <0.001 |
| 69 | LGALS3  | 2.46 | <0.001 | CCDC71    | -4.43 | <0.001 |
| 70 | COL1A2  | 2.45 | <0.001 | KIFC2     | -4.39 | <0.001 |
| 71 | KRT7    | 2.44 | <0.001 | ZNF789    | -4.38 | <0.001 |
| 72 | OSTbeta | 2.44 | 0.070  | KLHDC1    | -4.36 | <0.001 |
| 73 | DCN     | 2.44 | <0.001 | CLK1      | -4.30 | <0.001 |
| 74 | NRXN2   | 2.43 | 0.006  | MYH3      | -4.29 | <0.001 |
| 75 | VTCN1   | 2.42 | 0.135  | DMTF1     | -4.27 | <0.001 |
| 76 | TSPAN13 | 2.42 | <0.001 | CRIPAK    | -4.27 | <0.001 |
| 77 | PLAUR   | 2.42 | <0.001 | WDR27     | -4.23 | <0.001 |
| 78 | PMEPA1  | 2.42 | <0.001 | RBM6      | -4.18 | <0.001 |
| 79 | MMP9    | 2.41 | 0.070  | NRBP2     | -4.18 | <0.001 |
| 80 | CLIC6   | 2.41 | 0.044  | SNORA70   | -4.16 | <0.001 |
| 81 | CXCL6   | 2.40 | 0.017  | RAB24     | -4.14 | <0.001 |
| 82 | GPNMB   | 2.40 | <0.001 | TLL3      | -4.12 | <0.001 |
| 83 | SPRY1   | 2.39 | <0.001 | NGFRAP1   | -4.11 | <0.001 |
| 84 | CPA3    | 2.38 | 0.006  | STAG3L1   | -4.06 | <0.001 |
| 85 | EFEMP1  | 2.38 | 0.044  | PHACS     | -4.05 | <0.001 |
| 86 | EMP3    | 2.37 | <0.001 | PTBP2     | -4.04 | <0.001 |
| 87 | PODN    | 2.37 | <0.001 | RAPH1     | -3.97 | <0.001 |
| 88 | FRZB    | 2.35 | <0.001 | COL7A1    | -3.97 | <0.001 |

|     |        |      |        |          |       |        |
|-----|--------|------|--------|----------|-------|--------|
| 89  | PLA2G7 | 2.35 | <0.001 | NFKBIZ   | -3.96 | <0.001 |
| 90  | CCL4L1 | 2.34 | <0.001 | MGC33556 | -3.93 | <0.001 |
| 91  | AIF1   | 2.33 | <0.001 | SFRS14   | -3.93 | <0.001 |
| 92  | RNASE1 | 2.32 | <0.001 | XAF1     | -3.92 | <0.001 |
| 93  | IGFBP6 | 2.32 | <0.001 | DDX17    | -3.87 | <0.001 |
| 94  | CLDN10 | 2.32 | <0.001 | INDOL1   | -3.87 | <0.001 |
| 95  | HSPB8  | 2.32 | <0.001 | C17orf55 | -3.85 | <0.001 |
| 96  | EGR1   | 2.32 | 0.053  | TDRD6    | -3.84 | <0.001 |
| 97  | SYT13  | 2.32 | 0.031  | MT1E     | -3.82 | <0.001 |
| 98  | CST7   | 2.31 | <0.001 | SLC25A27 | -3.82 | <0.001 |
| 99  | FBLN1  | 2.31 | 0.007  | JOSD3    | -3.75 | <0.001 |
| 100 | NQO1   | 2.31 | 0.012  | FAM76B   | -3.74 | <0.001 |

\* FDR adjusted p-value (Benjamini-Hochberg)
